# Supplementary material
Source: ML conference proceedings conference paper supplement (https://openreview.net/forum?id=8mFVIRTr7I)
Supplement: supplementary_material [file neurips_supp.pdf › neurips_supp.pdf]

---

# Supplementary:

## MAE-Pure: Semantic-Preserving Adversarial Purification

---

Anonymous Author(s)

Affiliation

Address

email

### A Comparing with the advanced generative capability of the diffusion-based method

To explore the origins of the enhanced performance observed with MaskDiT-Pure and RMaskDiT-Pure, we conducted a series of controlled experiments. We began by evaluating the generative capabilities of the diffusion model using the standard reconstruction process of MaskDiT-Pure and RMaskDiT-Pure for image purification. This process, which includes both the forward (noise addition) and backward (denoising) steps, mirrors the approach used in DiffPure [1], where the reconstructed images serve as purified samples. We labeled these modified models as MaskDiT<sub>purification</sub> and RMaskDiT<sub>purification</sub>. We then compared their performance against our AMV-based methods, MaskDiT-Pure and RMaskDiT-Pure. By keeping the model architecture consistent across all variants, we enabled a direct comparison of the effectiveness of different denoising strategies.

Table 1: Ablation analysis on different denoising components across various datasets.

| Method                           | Architecture | CIFAR10      |              | CIFAR100     |              | SVHN         |              |
|----------------------------------|--------------|--------------|--------------|--------------|--------------|--------------|--------------|
|                                  |              | Std acc      | Robust acc   | Std acc      | Robust acc   | Std acc      | Robust acc   |
| MaskDiT <sub>purification</sub>  | WRN-28-10    | 91.13        | 42.99        | 63.29        | 13.57        | 92.28        | 40.07        |
| RMaskDiT <sub>purification</sub> | WRN-28-10    | 90.57        | 47.57        | 64.15        | 18.55        | 93.03        | 45.19        |
| MaskDiT-Pure                     | WRN-28-10    | 92.03        | 50.57        | <b>70.03</b> | 24.39        | 94.91        | 46.57        |
| RMaskDiT-Pure                    | WRN-28-10    | <b>93.11</b> | <b>62.13</b> | 69.87        | <b>29.91</b> | <b>95.39</b> | <b>55.90</b> |

Table 1 displays the standard and robust accuracies under a classifier (WRN-28-10) across three datasets: CIFAR-10, CIFAR-100, and SVHN. MaskDiT-Pure and RMaskDiT-Pure significantly outperform their counterparts that rely on the reconstruction pipeline, MaskDiT<sub>purification</sub> and RMaskDiT<sub>purification</sub>, in both standard and robust accuracy. For example, RMaskDiT-Pure improves robust accuracy from 47.57% to 62.13% on CIFAR-10 and from 45.19% to 55.90% on SVHN. These results confirm two key points: (1) The advanced generative capability of the diffusion backbone indeed contributes to performance improvements; (2) Our AMV-based method is orthogonal to the advanced generation ability, indicating that diffusion models can be integrated into our approach to further boost performance.

### References

- [1] Weili Nie, Brandon Guo, Yujia Huang, Chaowei Xiao, Arash Vahdat, and Anima Anandkumar. Diffusion models for adversarial purification. *International Conference on Machine Learning*, 2022.
